# Supplementary material for: Polymorphisms in Iron Homeostasis Genes and Urinary Cadmium Concentrations among Nonsmoking Women in Argentina and Bangladesh
Source: PubMed Central journal article supplement (PMC3620753; doi:10.1289/ehp.1205672), 2013-02-15
Supplement: ehp.1205672.s001.pdf [file ehp.1205672.s001.pdf]

## Supplemental Material

### Polymorphisms in Iron Homeostasis Genes and Urinary Cadmium Concentrations among Nonsmoking Women in Argentina and Bangladesh

Gerda Rentschler, Maria Kippler, Anna Axmon, Rubhana Raqib, Eva-Charlotte Ekström,  
Staffan Skerfving, Marie Vahter, Karin Broberg

| <b>Table of Contents:</b>                                                                                                | <b>Page</b> |
|--------------------------------------------------------------------------------------------------------------------------|-------------|
| <b>Supplemental Material, Table S1</b><br>Genes and polymorphisms that were successfully genotyped.                      | <b>2</b>    |
| <b>Supplemental Material, Table S2</b><br>Polymorphisms that were genotyped but later excluded from the data evaluation. | <b>4</b>    |
| <b>Supplemental Material, Table S3</b><br>SNP-related modification of transcription factor binding sites                 | <b>5</b>    |
| <b>Supplemental Material, Table S4</b><br>Gene expression data for iron-related genes in the Andean women                | <b>7</b>    |

Supplemental Material, Table S1. Genes and polymorphisms that were successfully genotyped (quality requirements: at least 90% of samples with clearly defined genotypes<sup>a</sup> ).

| <i>Gene</i><br>Unigene Nr <sup>b</sup><br>Protein name<br>Location | rs nr <sup>c</sup> | Polymorphism<br>type <sup>d</sup> | Allele<br>frequencies<br>Argentinean<br>Andes | QC <sup>a</sup><br>(%) | Allele<br>frequencies<br>Bangladesh | QC <sup>a</sup><br>(%) |
|--------------------------------------------------------------------|--------------------|-----------------------------------|-----------------------------------------------|------------------------|-------------------------------------|------------------------|
| <i>SLC11A2</i>                                                     | rs149411           | Intron C>T                        | 75/25                                         | 96                     | 37/63                               | 99                     |
| Hs.505545                                                          | rs224572           | Intron G>A                        | 41/59                                         | 96                     | 28/72                               | 94                     |
| DMT1                                                               | rs224574           | Intron C>T                        | 1/99                                          | 98                     | 10/90                               | 99                     |
| NRAMP2                                                             | rs224575           | Intron G>A                        | 75/25                                         | 97                     | 37/63                               | 99                     |
| Chr 12q13                                                          | rs364627           | Intron G>A                        | 1/99                                          | 96                     | 10/90                               | 93                     |
|                                                                    | rs407135           | Intron C>A                        | 8/92                                          | 97                     | 34/66                               | 100                    |
|                                                                    | rs1005559          | Intron T>A                        | 7/93                                          | 97                     | 24/76                               | 96                     |
|                                                                    | rs2269683          | Intron C>T                        | 34/66                                         | 96                     | 9/91                                | 99                     |
|                                                                    | rs3809320          | Upstream T>A                      | 35/65                                         | 97                     | 9/91                                | 96                     |
|                                                                    | rs6580779          | 5' UTR G>T                        | 1/99                                          | 96                     | 10/90                               | 95                     |
|                                                                    | rs12366756         | Intron G>A                        | 7/93                                          | 98                     | 24/76                               | 99                     |
|                                                                    | rs12830073         | Intron T>C                        | 6/94                                          | 96                     | 24/76                               | 90                     |
| <i>SLC40A1</i>                                                     | rs1123110          | Intron C>T                        | 12/88                                         | 95                     | 34/66                               | 97                     |
| Hs.643005                                                          | rs1439816          | Intron C>G                        | 12/88                                         | 97                     | 22/78                               | 100                    |
| FPN1                                                               | rs4145237          | Intron C>G                        | 15/85                                         | 97                     | 33/67                               | 99                     |
| Chr 2q32                                                           | rs4667287          | Intron C>A                        | 14/86                                         | 98                     | 19/81                               | 100                    |
|                                                                    | rs11884632         | Intron C>G                        | 0/100                                         | 98                     | 13/87                               | 98                     |
| <i>TF</i>                                                          | rs12595            | Intron G>A                        | 58/43                                         | 98                     | 41/59                               | 99                     |
| Hs.518267                                                          | rs1049296          | S589P T>C                         | 4/96                                          | 98                     | 21/79                               | 99                     |
| Transferrin                                                        | rs1130459          | 5' UTR A>G                        | 6/94                                          | 98                     | 25/75                               | 97                     |
| Chr 3q22.1                                                         | rs1799852          | L247L T>C                         | 12/88                                         | 97                     | 21/79                               | 99                     |
|                                                                    | rs2280673          | Intron C>A                        | 15/85                                         | 98                     | 48/52                               | 98                     |
|                                                                    | rs2715627          | Intron C>T                        | 3/97                                          | 97                     | 15/85                               | 99                     |
|                                                                    | rs3811647          | Intron A>G                        | 58/42                                         | 97                     | 42/58                               | 96                     |
|                                                                    | rs4241357          | Intron G>T                        | 29/71                                         | 97                     | 28/72                               | 100                    |
|                                                                    | rs4355280          | Intron G>A                        | 58/42                                         | 96                     | 53/47                               | 96                     |
|                                                                    | rs4428180          | Intron G>A                        | 37/63                                         | 96                     | 23/77                               | 97                     |
|                                                                    | rs4459901          | Intron C>T                        | 54/46                                         | 98                     | 37/63                               | 99                     |
|                                                                    | rs4532136          | Intron A>G                        | 12/88                                         | 98                     | 18/82                               | 99                     |
|                                                                    | rs6785596          | Intron A>T                        | 3/97                                          | 98                     | 15/85                               | 99                     |
|                                                                    | rs6796795          | Intron G>A                        | 3/97                                          | 97                     | 15/85                               | 100                    |
|                                                                    | rs8177184          | Intron G>A                        | 36/64                                         | 98                     | 22/78                               | 99                     |
|                                                                    | rs8177186          | 5' UTR T>G                        | 12/88                                         | 96                     | 18/82                               | 97                     |
|                                                                    | rs8177190          | Intron T>C                        | 25/75                                         | 97                     | 9/91                                | 97                     |
|                                                                    | rs8177191          | Intron A>G                        | 2/98                                          | 98                     | 7/93                                | 99                     |
|                                                                    | rs8177213          | Intron C>A                        | 27/73                                         | 97                     | 14/86                               | 96                     |
|                                                                    | rs8177235          | Intron A>G                        | 14/86                                         | 97                     | 16/84                               | 97                     |
|                                                                    | rs41298977         | A76V T>C                          | 0/100                                         | 98                     | 0/100                               | 99                     |

Supplemental Material, Table S1 (cont.)

| Gene<br>Unigene Nr <sup>b</sup><br>Protein name<br>Location | rs nr <sup>c</sup> | Polymorphism<br>type <sup>d</sup> | Allele<br>frequencies<br>Argentinean<br>Andes | QC <sup>a</sup><br>(%) | Allele<br>frequencies<br>Bangladesh | QC <sup>a</sup><br>(%) |
|-------------------------------------------------------------|--------------------|-----------------------------------|-----------------------------------------------|------------------------|-------------------------------------|------------------------|
| <i>TFR2</i>                                                 | rs7385804          | Intron C>A                        | 18/82                                         | 96 (*)                 | 37/63                               | 100                    |
| Hs.544932                                                   | rs10247962         | Intron G>A                        | 2/98                                          | 98                     | 24/76                               | 99                     |
| TFR2<br>Chr 7q22                                            | rs34242818         | I238M G>C                         | 0/100                                         | 98                     | 1/99                                | 98                     |
| <i>TFRC</i>                                                 | rs2284889          | Intron T>C                        | 27/73                                         | 97                     | 50/50                               | 98                     |
| Hs.529618                                                   | rs3736651          | Intron T>A                        | 43/57                                         | 96                     | 21/79                               | 99                     |
| TFRC<br>Chr 3q29                                            | rs3761717          | Intron C>G                        | 73/27                                         | 97                     | 49/51                               | 94                     |
|                                                             | rs3804141          | Intron A>G                        | 26/74                                         | 97 (*)                 | 14/86                               | 100                    |
|                                                             | rs9859260          | Intron G>A                        | 73/27                                         | 97                     | 50/50                               | 95                     |
|                                                             | rs9859401          | Intron T>G                        | 27/73                                         | 97                     | 49/51                               | 95                     |
|                                                             | rs11185506         | Intron C>G                        | 27/73                                         | 97                     | 49/51                               | 98                     |
|                                                             | rs13072608         | Intron G>A                        | 73/27                                         | 97                     | 49/51                               | 96                     |
|                                                             | rs41301381         | L212V G>C                         | 0/100                                         | 98                     | 0/100                               | 100                    |

<sup>a</sup> QC percent represents the percentage of samples with clearly defined genotypes (based on Sequenom mass spectrometry analysis). None of the SNPs showed Hardy-Weinberg disequilibrium in both populations. SNPs that demonstrated disequilibrium in one of the populations are marked with (\*).

<sup>b</sup> Unigene accession number from NCBI (National Center for Biotechnology Information) Unigene Database (website: <http://www.ncbi.nlm.nih.gov/entrez/query.fcgi?db=unigene>).

<sup>c</sup> rs numbers from NCBI SNP Database (website: <http://www.ncbi.nlm.nih.gov/SNP>).

<sup>d</sup> When applicable, amino acid position/gene region is denoted. The rare allele in Bangladesh is denoted first.

Supplemental Material, Table S2. Polymorphisms that were genotyped but later excluded from the data evaluation.

| <i>Gene</i>    | rs nr <sup>a</sup> | Polymorphism type <sup>b</sup> | QC <sup>c</sup><br>Argentinean<br>Andes (%) | QC <sup>c</sup><br>Bangladesh<br>(%) | Reason for exclusion       |
|----------------|--------------------|--------------------------------|---------------------------------------------|--------------------------------------|----------------------------|
| <i>SLC11A2</i> | rs224446           | 3' UTR A>G                     | 82                                          | 88                                   | too low analytical quality |
|                | rs17216051         | T298I C>T                      | 98                                          | 99                                   | no variants detected       |
|                | rs17216086         | W500R T>C                      | 97                                          | 99                                   | no variants detected       |
|                | rs17222449         | Q290R A>G                      | 97                                          | 99                                   | no variants detected       |
|                | rs17222470         | H62Y C>T                       | 98                                          | 99                                   | no variants detected       |
| <i>SLC40A1</i> | rs11568350         | H248Q T>G                      | 97                                          | 99                                   | no variants detected       |
|                | rs45606432         | L443P T>C                      | 97                                          | 100                                  | no variants detected       |
| <i>TFRC</i>    | rs3817672          | S142G A>G                      | 78                                          | 89                                   | too low analytical quality |

<sup>a</sup> rs numbers from NCBI SNP Database (website: <http://www.ncbi.nlm.nih.gov/SNP>).

<sup>b</sup> When applicable, amino acid position/gene region is denoted.

<sup>c</sup> QC percent represents the percentage of samples with clearly defined genotypes (based on Sequenom mass spectrometry analysis).

Supplemental Material, Table S3. SNP-related modification of transcription factor binding sites according to the EIDorado database<sup>a</sup>. SNPs analyzed were associated with concentrations of Cd biomarkers or ferritin (see Result section of the main text).

| Gene<br>SNP        | Allele | Effect | Site affected<br>Family/Factor | Description                                                                    |
|--------------------|--------|--------|--------------------------------|--------------------------------------------------------------------------------|
| <b><i>TFRC</i></b> |        |        |                                |                                                                                |
| rs3804141          | G -> A | new    | HOXC/HOX_PBX                   | HOX/PBX binding sites                                                          |
|                    | G -> A | new    | SNAP/PSE02                     | Proximal sequence element (PSE) of RNA polymerase III-transcribed genes        |
| <b><i>TF</i></b>   |        |        |                                |                                                                                |
| rs12595            | A -> G | lost   | FKHD/HNF3.01                   | Hepatocyte nuclear factor 3 (alpha, beta) (FOXA1, FOXA2)                       |
|                    | A -> G | new    | HOMF/HMX2.02                   | Hmx2/Nkx5-2 homeodomain transcription factor                                   |
|                    | A -> G | new    | MYT1/MYT1.01                   | MyT1 zinc finger transcription factor involved in primary neurogenesis         |
| rs3811647          | G -> A | new    | NR2F/TR2.01                    | Nuclear hormone receptor TR2, DR5 binding sites                                |
| rs4459901          | T -> C | new    | CREB/CREB.02                   | cAMP-responsive element binding protein                                        |
|                    | T -> C | new    | CREB/ATF1.01                   | Activating transcription factor 1                                              |
|                    | T -> C | new    | CREB/CREB1.01                  | cAMP-responsive element binding protein 1                                      |
|                    | T -> C | new    | E4FF/E4F.01                    | GLI-Krueppel-related transcription factor, regulator of adenovirus E4 promoter |
|                    | T -> C | new    | HIFF/HIF1.01                   | Hypoxia induced factor-1 (HIF-1)                                               |
|                    | T -> C | lost   | LHXF/ISL1.01                   | Pancreatic and intestinal lim-homeodomain factor                               |
|                    | T -> C | lost   | PDX1/PDX1.01                   | Pdx1 (IDX1/IPF1) pancreatic and intestinal homeodomain TF                      |
|                    | T -> C | lost   | RXRF/RAR_RXR.03                | Retinoic acid receptor / retinoid X receptor heterodimer, DR5 sites            |

## Supplemental Material, Table S3 (cont.)

| Gene<br>SNP        | Allele | Effect | Site affected<br>Family/Factor | Description                                                                   |
|--------------------|--------|--------|--------------------------------|-------------------------------------------------------------------------------|
| rs8177186          | G -> T | new    | CART/PHOX2.01                  | Phox2a (ARIX) and Phox2b                                                      |
|                    | G -> T | new    | CART/CART1.01                  | Cart-1 (cartilage homeoprotein 1)                                             |
|                    | G -> T | new    | PARF/DBP.01                    | Albumin D-box binding protein                                                 |
|                    | G -> T | lost   | TEAF/TEAD.01                   | TEA domain-containing factors,<br>transcriptional enhancer factors<br>1,3,4,5 |
| <b><i>TFR2</i></b> |        |        |                                |                                                                               |
| rs7385804          | C -> A | new    | BCDF/PCE1.01                   | Photoreceptor conserved element 1                                             |
|                    | C -> A | new    | DLXF/DLX3.01                   | Distal-less 3 homeodomain<br>transcription factor                             |
|                    | C -> A | new    | HBOX/GSH2.01                   | Homeodomain transcription factor<br>Gsh-2                                     |
|                    | C -> A | new    | HOMF/MSX2.01                   | Muscle segment homeobox 2,<br>homologue of Drosophila (HOX 8)                 |
|                    | C -> A | new    | NKXH/NKX25.02                  | Homeodomain factor Nkx-2.5/Csx,<br>tinman homolog low affinity sites          |
|                    | C -> A | new    | OCT1/OCT1.06                   | Octamer-binding factor 1                                                      |
|                    | C -> A | lost   | SORY/HBP1.01                   | HMG box-containing protein 1                                                  |
|                    | C -> A | lost   | TEAF/TEAD.01                   | TEA domain-containing factors,<br>transcriptional enhancer factors<br>1,3,4,5 |

<sup>a</sup> Version 08-2011 of the Genomatix software suite (<http://www.genomatix.de/en/index.html>)

Supplemental Material, Table S4. Gene expression data for iron-related genes measured in peripheral blood in the Andean women (N=72).

| Gene           | Probe        | Probe location | Expression <sup>a</sup><br>Median (Range) | Spearman correlation coefficients (p-values) |                          |                          |                             |                             |
|----------------|--------------|----------------|-------------------------------------------|----------------------------------------------|--------------------------|--------------------------|-----------------------------|-----------------------------|
|                |              |                |                                           | <i>TF</i> <sup>b</sup>                       | <i>TFR2</i> <sup>b</sup> | <i>TFRC</i> <sup>b</sup> | <i>SLC11A2</i> <sup>b</sup> | <i>SLC40A1</i> <sup>b</sup> |
| <i>TF</i>      | ILMN_1768425 | exon 17        | 112 (86-147)                              |                                              |                          |                          |                             |                             |
| <i>TFR2</i>    | ILMN_1724738 | exon 18        | 111 (91-138)                              | 0.18 (0.1)                                   |                          |                          |                             |                             |
| <i>TFRC</i>    | ILMN_1674243 | exon 19        | 294 (168-773)                             | 0.05 (0.7)                                   | -0.12 (0.3)              |                          |                             |                             |
| <i>SLC11A2</i> | ILMN_1745034 | exon 19b       | 132 (101-201)                             | -0.19 (0.1)                                  | -0.21 (0.08)             | 0.32 (0.006)             |                             |                             |
| <i>SLC40A1</i> | ILMN_1761833 | exon 8         | 255 (117-570)                             | 0.15 (0.2)                                   | 0.09 (0.4)               | 0.56 (3.8E-07)           | 0.17 (0.2)                  |                             |
| <i>SLC40A1</i> | ILMN_2053103 | exon 8         | 400 (184-1021)                            | 0.22 (0.06)                                  | 0.11 (0.3)               | 0.55 (7.33E-07)          | 0.25 (0.03)                 | 0.92 (1.5E-29)              |

<sup>a</sup> Gene expression is presented in relative fluorescence units.

<sup>b</sup> P-values are written in parentheses.
